# 1 Laser ablation tomography (LATscan) as a new tool for anatomical 2 studies of woody plants

3  
4 Israel L. Cunha Neto<sup>1\*</sup>, Benjamin Hall<sup>3</sup>, Asheesh Lanba<sup>2,3</sup>, Joshua Blosenski<sup>2</sup>, Joyce G.  
5 Onyenedum<sup>1\*</sup>

6 <sup>1</sup>School of Integrative Plant Sciences and L.H. Bailey Hortorium, Cornell University, Ithaca, NY 14853, USA

7 <sup>2</sup>Laser for Innovative Solutions (L4iS), Suite 261, 200 Innovation Boulevard, State College, PA 16803, USA

8 <sup>3</sup>Department of Engineering, University of Southern Maine, 37 College Ave., Gorham, ME 04038, USA

## 9 10 ORCID:

11 Israel L. Cunha Neto: 0000-0002-0914-9974

12 Asheesh Lanba: 0000-0003-3177-7819

13 Joyce G. Onyenedum: 0000-0002-1047-9807

## 14 15 Twitter:

16 Israel L. Cunha Neto @ilcneto

17 Asheesh Lanba @DrLanba

18  
19 \*Author for correspondence: [israellopescn@gmail.com](mailto:israellopescn@gmail.com), [i.cunhaneto@cornell.edu](mailto:i.cunhaneto@cornell.edu); [jgc235@cornell.edu](mailto:jgc235@cornell.edu)

## 20 21 Summary

- 22 • Traditionally, botanists study the anatomy of plants by carefully sectioning samples, histological staining  
23 to highlight tissues of interests, then imaging slides under light microscopy. This approach generates  
24 significant details; however, this traditional workflow is laborious and time consuming, and ultimately  
25 yields two-dimensional (2D) images. Laser Ablation Tomography (LATscan) is a high-throughput  
26 imaging system that yields hundreds of images per minute. This method has proven useful for studying  
27 the structure of delicate plant tissues, however its utility in understanding the structure of tougher woody  
28 tissues is underexplored.
- 29 • We report LATscan-derived anatomical data from several woody stems (ca. 20 mm) of eight species and  
30 compare these results to those obtained through traditional anatomical techniques.
- 31 • LATscan successfully allows the description of tissue composition by differentiating cell type, size, and  
32 shape, but also permits the recognition of distinct cell wall composition (e.g., lignin, suberin, cellulose)  
33 based on differential fluorescent signals on unstained samples.
- 34 • LATscan generate high-resolution 2D images and 3D reconstructions of woody plant samples, therefore  
35 this new technology is useful for both qualitative and quantitative analyses. This high-throughput imaging  
36 technology has the potential to bolster phenotyping of vegetative and reproductive anatomy, wood  
37 anatomy, and other biological systems such as plant-pathogen and parasitic plant associations.

38 **Key words:** cell wall; high throughput imaging; laser ablation tomography; lignin; plant anatomy; plant  
39 phenotyping; vines.

## 40 Introduction

41 Understanding the diversity of plant form and function is the motivating principle in the botanical  
42 sciences (Haberlandt, 1914). For centuries, botanists have come to understand the morphology and  
43 anatomy of plant organs by carefully sectioning plant material, followed by histological staining, and  
44 observation through microscopy (Johansen, 1940; Ruzin, 1999). These classical techniques yield fine details  
45 on the tissue and cellular levels; however, each step of the traditional workflow is time-consuming, and  
46 ultimately yields two-dimensional (2D) microscopy images (see Supporting information Table S1 for a  
47 summary of plant anatomy methods). In compliment, scientists usually need to rely on additional techniques  
48 to obtain further information on intracellular features, including cell wall composition, cell content, as well as  
49 to obtain three-dimensional (3D) reconstructions. Therefore, to thoroughly understand the anatomy of plant  
50 organs a large combination of techniques is necessary.

51 The typical workflow to study the internal structure of plants—i.e., plant anatomy— with light  
52 microscopy usually follows these steps: (1) fixation of fresh plant samples to preserve the architectural  
53 integrity; (2) embedding of fixed material to provide the sample with support during sectioning; (3) staining to  
54 highlight anatomical features of interests (e.g., cell wall composition) and to generate contrast between  
55 tissue types; (4) sectioning on a microtome; (5) microscopy to observe anatomy and (6) imaging to archive  
56 anatomical observations (Johansen, 1940; Ruzin, 1999). This general workflow has been applied with great  
57 success (Fig. 1a-d, f). Together, the above workflow takes a minimum of two weeks, and each step has its  
58 own nuances and pitfalls that must be modified depending on the tissue. Throughout the years, several  
59 modifications have been proposed to improve the typical anatomical workflow. For example, multiple  
60 alternative fixatives are presented by Johansen (1940) and Ruzin (1999), and there have been several  
61 alterations to embedding and sectioning of complex tissues (Barbosa *et al.*, 2010; Mozzi *et al.*, 2021;  
62 Romanov *et al.*, 2021). Hard woody samples pose a particular challenge, as these samples must be  
63 softened prior to embedding to ensure ease of sectioning downstream; to soften these samples, researchers  
64 boil samples in water or in a softens like hydrofluoric acid (Pace, 2019) or Ethylenediamine diluted in water  
65 (Kukachka, 1977; Carlquist, 1982) for variable amounts of time which can extends the entire workflow to as  
66 long as one month per sample. In some cases, these softening procedures can lead to altering the structure  
67 from its native state, either detaching the bark from the wood or by eliminating cell content such as crystals  
68 (Pace, 2019). Alternatively, woody samples can be studied by macroscopic analysis which normally requires  
69 only polishing the stem surface (Fig. 1g) or wood blocks, followed by imaging through different systems  
70 (Table S1), however this technique losses fine-scale detail on cell wall composition, and does not work for  
71 herbaceous samples.

72 Other methodological approaches that explore anatomical slides in light microscopy is  
73 histochemistry, i.e., the application of specific reagents and dyes to detect the main classes of chemical  
74 compounds such as lipids and latex (Demarco, 2017; Ribeiro & Leitão, 2020). However, histochemical  
75 analysis is preferably applied to fresh tissues, and requires sectioning and staining procedures, as sections  
76 should be imaged immediately after test application to avoid altered results. In addition to light microscopy,  
77 general anatomy is also frequently explored using wide-field fluorescence or confocal laser scanning  
78 microscopy (CLSM) (Fig. 1e) (Prunet *et al.*, 2016). Unlike methods applied for light microscope, fluorescence  
79 microscopy methods allow analyzing the plant tissues without the need to carry out a staining method. For

80 example, imaging autofluorescence of unstained samples is a simple approach to identify lignified cell walls  
81 in woody and non-woody tissues (Kitin *et al.*, 2020; Pegg *et al.*, 2021; Maceda & Terrazas, 2022), yet the  
82 use of fluorescent dyes—e.g., immunohistochemistry with fluorescent secondary antibodies—can reveal the  
83 specific localization of other cell wall polymers, including pectins, hemicelluloses, and arabinogalactan  
84 proteins (e.g., (Guedes *et al.*, 2017).

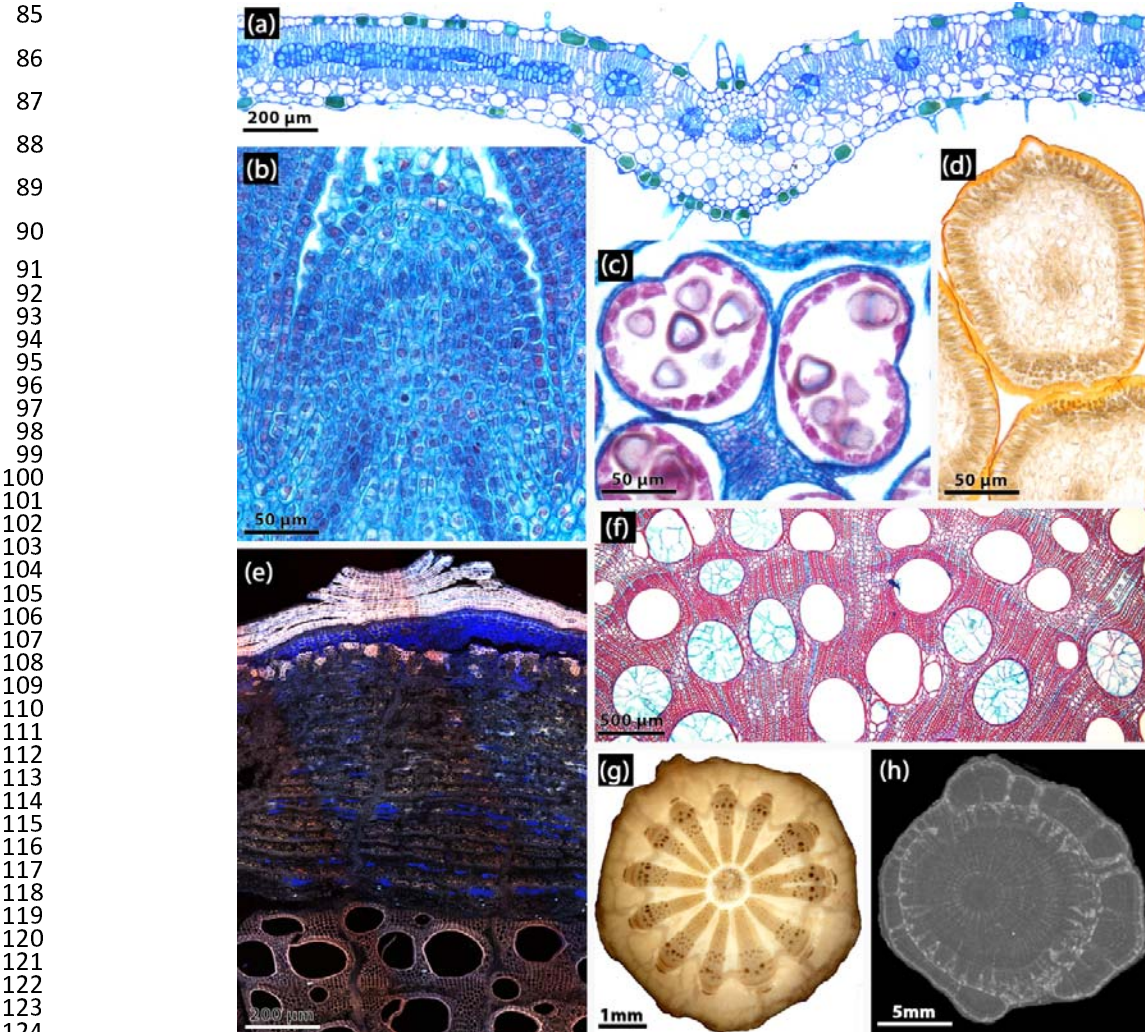

126 **Fig. 1** Examples of anatomical images of various plant tissues using different methods applied in plant  
127 anatomy. (a-e,g,i) Microscopic analyses. (f) Macroscopy analyses. (h) 3D imaging, X-ray microtomography.  
128 (a) *Allionia incarnata* (Nyctaginaceae) – leaf blade processed with historesin embedding, sectioned with  
129 rotary microtome, and stained with Toluidine Blue O. (b) *Colignonia glomerata* (Nyctaginaceae) – processed  
130 with paraplast embedding, sectioned with rotary microtome, and stained with Safranin O and Astra Blue. (c-  
131 d) *Dalechampia alata* (Euphorbiaceae). (c) Detail of anther with pollen grains, processed with paraffin  
132 embedding, sectioned with rotary microtome, and stained with Safranin and Astra Blue. (d) Histochemical  
133 analysis of secretory glands showing positive result for lipids in the cuticle; sample sectioned with  
134 cryomicrotome and submitted to Sudan IV reaction. (e) *Wisteria floribunda* (Fabaceae) – freehand section of  
135 the stem, unstained, and imaged with confocal microscopy (maximum intensity projection with three  
136 channels). (f) *Dalechampia alata* (Euphorbiaceae), large woody stem processed with polyethylene glycol  
137 embedding, sectioned with sliding microtome, and stained with Safranin and Astra Blue. (g) *Menispermum*  
138 *canadense* (Menispermaceae) – polished mature stem, non-stained, processed for macroscopic analysis. (h)  
139 *Paullinia micrantha* (Sapindaceae) – stem with successive cambia processed with X-ray microtomography,  
140 unstained.  
141

142           Within plant anatomy, wood and bark anatomy are particularly laborious because some cells run  
143 parallel (axial parenchyma), while others run perpendicular (ray parenchyma) to the plant axis, therefore  
144 researchers must section three separate planes i.e., transverse, longitudinal radial and longitudinal  
145 tangential to understand the 3D structure of a wood (Brodersen, 2013). Moreover, wood and bark are  
146 complex tissues composed of cells with unique contents (e.g., phenolics, starch), and cell wall composition  
147 (e.g., cellulose, lignin, suberin), therefore multiple stains must be used to extract these data. Other complex  
148 traits that are challenging to understand through traditional anatomical methods are vascular variants i.e.,  
149 alternative patterns of vascular growth generating odd and intricate morphologies (Bastos *et al.*, 2016;  
150 Cunha Neto *et al.*, 2018; Rizzieri *et al.*, 2021), or plant-parasitic interactions where the parasite obtain water  
151 and nutrients from the host plant through the complex and dynamic structure, the haustorium (Teixeira-Costa  
152 & Ceccantini, 2016; Mylo *et al.*, 2021), respectively. To gain a structural understanding of these complex  
153 networks, 3D reconstructions have been made using X-ray microtomography (Fig. 1h) and magnetic  
154 resonance imaging (Oven *et al.*, 2011; Meixner *et al.*, 2021), however, these methods are time-consuming  
155 and result in grayscale data that can miss or conflate different anatomical features. Alternative high  
156 throughput methods maximizing the understanding of plant morphology and anatomy continues  
157 underexplored in plant sciences.

158           Laser ablation tomography (LATscan) is a new three-dimensional imaging methodology (Hall *et al.*,  
159 2016; Hall & Lanba, 2019). The technology uses a high-powered ultrafast pulsed ultraviolet (UV) laser to  
160 remove cross-sections off samples, and an image of the section is captured prior to removal at the laser  
161 ablation plane (Fig. 2). A linear stage feeds the sample into the laser ablation plane. The images with UV-  
162 induced fluorescence are captured prior to removal. These RGB images allow for easier identification and  
163 segmentation of features of interest and are stacked to construct 3D models. LATscan has been used by  
164 researchers to study plant and insect anatomy. Yang *et al.* (2019) used LATscan to image maize roots in  
165 order to study root phenotypes that improve nitrogen acquisition. The technology was also used to visualize  
166 and quantify edaphic organism colonies in maize, barley, bean roots (Strock *et al.*, 2019). Morrison *et al.*  
167 (Morrison *et al.*, 2020) used LATscan for more accurate measurements of internal wheat grain volumes  
168 affected by weevil parasites that grow inside grains. LATscan also helped reveal the structure of specialized  
169 storage structures containing symbiotic fungi (e.g., mycangia) in the Ambrosia beetle (Li *et al.*, 2018).  
170 Lehnert *et al.* (2022) recently used LATscan to reveal anatomical features in antlion that helped them prove  
171 evolutionary adaptation that have made these insects successful in sandy habitats. Schneider *et al.* (2020)  
172 used LATscan to quantify root anatomical phenes in their investigation to find the genes that control root  
173 plasticity in maize. The technology was also used to quantify and compare the vasculature in oak, beech and  
174 spruce branches in order to study hydraulic redistribution under moderate drought conditions (Hafner *et al.*,  
175 2017). Therefore, this method has proven useful for studying the structure of small roots, herbaceous plants,  
176 and flowers (Martínez-Gómez *et al.*, 2022; Strock *et al.*, 2022), however its utility in understanding the  
177 structure of tougher woody tissues is underexplored.

178           In this study, we demonstrate the potential of LATscan for plant anatomical studies, with emphasis  
179 on woody stems of self-supporting and climbing plants (vines). First, we present this technology as a high  
180 throughput method to generate 3D reconstructions of woody stems. Next, we explore the potential of LAT as  
181 a complementary tool to investigate plant anatomy by comparing the resolution of anatomical data obtained



182 from LATscan to those obtained by conventional methods in plant anatomy. Our results indicate that  
183 LATscan is a powerful technology to generate morphological and anatomical features, while revealing  
184 differential fluorescent signals corresponding to cellulosic, lignified, and suberized cell walls.

185

## 186 **Material and Methods**

### 187 Plant material and study design

188 Woody stems with secondary growth were obtained from trees, shrubs, and woody vines across  
189 different lineages of seed plants (Table 1). In the field, all samples were fixed in formaldehyde-acetic acid-  
190 alcohol then subsequently stored in 70% ethanol (Johansen, 1940).

191 All samples were subject to LATscans and microscopic analyses i.e., generating stained anatomical  
192 slides for light microscopy, and unstained slides to detect autofluorescence of cell walls using confocal  
193 microscopy. Additionally, all samples were polished and imaged under a stereo microscope for macroscopic  
194 analyses of gross anatomy. Below we describe how each of these techniques were optimized for this study.

195

### 196 LATscan setup and settings (Fig. 2)

197 LATscan of woody samples were performed at L4iS (State College, PA, USA and Seattle, WA,  
198 USA). An ultraviolet (UV) laser outputting at a wavelength of 355 nm was used. The pulse duration of the  
199 laser used for the imaging was less than 30 ns and it supplied a pulse energy of approximately 260  $\mu$ J. The  
200 pulse repetition rate was varied between 15 and 30 kHz. A linear drive stage fed in the sample at increments  
201 of 4  $\mu$ m, and hence the cross-sectional images were separated by that amount. The size of the native RGB  
202 images captured was 6720  $\times$  4480 pixels. The magnification resulted in a resolution of 1.1  $\mu$ m/pixel of the  
203 native images.

204

205

206

207

208

209

210

211

212

213

214

215

216

217

218

219

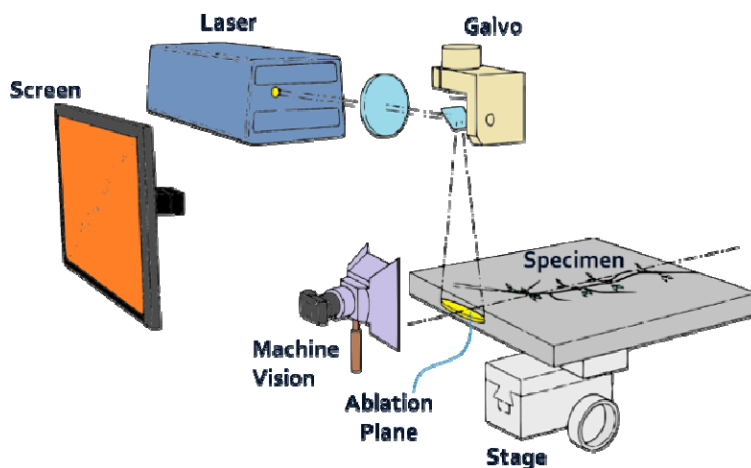

**Fig. 2** Schematic showing the setup of a LATscan system. The laser beam is guided onto the ablation plane using the galvo, and the specimen is fed in perpendicular to the ablation plane via the stage. As the sample is vaporized in the ablation plane, the remaining section is illuminated via UV-induced fluorescence from the laser, and this is captured by the RGB machine vision system.

216 Image analysis was done at the Lasers and Materials Engineering (LAME) laboratory at the  
217 University of Southern Maine (Portland, ME, USA). Image processing was performed using the FIJI software  
218 (Schindelin *et al.*, 2012). The 3D reconstructions and analysis were performed in FEI Avizo software (v  
219 2019.4 ThermoFisher Scientific, Inc., Waltham, MA, USA).

220 **Table 1** Studied taxa for comparison of traditional anatomical methods and Laser Ablation Tomography (LATscan), including information on site of  
 221 collection and stem diameter.  
 222

| Family         | Species                                 | Habit           | Collection site                                             | Accession number                | Stem diameter*                   |
|----------------|-----------------------------------------|-----------------|-------------------------------------------------------------|---------------------------------|----------------------------------|
| Gnetaceae      | <i>Gnetum urens</i> (Aubl.) Blume       | Woody vine      | Greenhouse Cornell University, USA                          | I.L. Cunha Neto s/n (BH)        | Small: 5mm; Large: 10mm          |
| Fabaceae       | <i>Wisteria sinensis</i> (Sims) DC.     | Woody vine      | Cornell Botanic Gardens, USA<br>Ithaca Commons, Ithaca, USA | 01-166*A<br>-                   | Large: 20mm, 40mm<br>Large: 30mm |
|                | <i>Wisteria floribunda</i> (Willd.) DC. | Woody vine      | A.D. White House, Cornell Campus, USA                       | -                               | Small: 10mm                      |
| Fagaceae       | <i>Quercus rubra</i> L.                 | Tree            | Beebe Lake, Cornell Campus, USA                             | -                               | Core wood sample: 5 mm           |
| Menispermaceae | <i>Cocculus orbiculatus</i> (L.) DC.    | Semi-woody vine | Arnold Arboretum, USA                                       | 163-2002*A                      | Large: 8mm                       |
|                | <i>Menispermum canadense</i> L.         | Semi-woody vine | Arnold Arboretum, USA                                       | 345-2017*C                      | Large: 8mm                       |
| Sapindaceae    | <i>Paullinia pinnata</i> L.             | Woody vine      | Barro Colorado Island, Panama                               | J.G. Onyenedum 41 (JEPS)        | Small: 8mm; Large: 18mm          |
|                | <i>Urvillea chacoensis</i> Hunz.        | Woody vine      | Botanic Garden of Departamento Santa Cruz, Bolivia          | P. Acevedo-Rodríguez, 4641 (US) | Large: 20mm                      |

223 \* One or two stem diameters were investigated per species used to different techniques; large samples are woodier; for LATscan stems up to 20 mm were  
 224 used; stem diameter is given in figure legends for each method applied in this study. BH: Bailey Hortorium Herbarium at Cornell University; JEPS: The  
 225 University and Jepson Herbaria of the University of California at Berkeley; US: United States National Herbarium, Smithsonian Institution.

## 226 Macroscopic analyses

227 To study the macroscopic characters (gross anatomy and position of important tissues such as  
228 periderm, cortex, pericyclic fibers, xylem, and pith) of woody samples, we applied the technique outlined in  
229 (Barbosa *et al.*, 2021). Briefly, this technique consists of manually polishing the surface of entire or  
230 fragments of stems and roots using increasing course grades of waterproof sandpapers (grit grades P600,  
231 P1200, P2000), under water. We then imaged polished cross sections using a Nikon SMV1500 stereoscope  
232 (Tokyo Japan) with a Nikon Digital Sights Fi-3 camera running Nikon Elements F software (version 4.60).

233

## 234 Microscopic Analyses

### 235 1. Light microscopy analyses

236 To generate microscopic images, we performed the following steps: (1) freehand sections of each  
237 species were generated using a razor blade, (2) sections were stained with Safrablau (see below), (3)  
238 sections were mounted with glycerol under a coverslip, and (4) stained slides were imaged using an  
239 Olympus BH2 with an Amscope MU1000 digital camera.

240

### 241 2. Confocal fluorescence microscopy

242 To generate microscopic slides to assess differences in cell wall composition, we performed the  
243 following steps: (1) freehand sections of each species were generated using a razor blade (2) sections were  
244 either left unstained or stained. The latter sections were stained with either Safrablau or Calcofluor White  
245 (see below), (3) sections were mounted with glycerol under a coverslip, and (4) slides were imaged using a  
246 IX-83 Spinning Disk Confocal Microscope or (Fig. S1) a Zeiss LSM 710 Confocal Microscope (Figs 1e,  
247 4d,h,i) at the Cornell Institute of Biotechnology's Imaging Facility.

248

## 249 Staining procedures

250 Safrablau is a combination of two dyes, Safranin-O (a basic or cationic dye with affinity to acid  
251 components) and Astra Blue (an acid or anionic dye with affinity to basic components). Anatomical sections  
252 double stained with Safrablau (or safranin + astra blue separately) and analyzed under light microscopy,  
253 display tissues with red and blue colors, as safranin and astra blue stain mostly lignified/suberized/cutinized  
254 or cellulosic cell walls, respectively. Safranin is fluorescent (Excitation= ~495 nm, Emission =~ 587nm) while  
255 Astra Blue is not. Calcofluor white is fluorescent (Excitation = 365-395 nm, Emission = 420 nm) and labels  
256 cellulose which is excited by UV light. Calcofluor white is sensitive to light, thus must be keep in the dark.

257 To evaluate how different dyes interact with LATscan of plant specimens for anatomical studies we  
258 used four staining procedures: 1) unstained samples, 2) Safrablau (9 parts 1% astra blue in 50% ethanol to 1  
259 part 1% safranin in 50% ethanol), 3) Calcofluor White (aqueous, 0.01% w/v, in darkness), 4) Safranin (1%  
260 w/v, in ethanol 50%) + 0.01% Calcofluor White. We also tested whether dry or wet samples would respond  
261 differently and evaluated different times to stain the samples. In some cases, samples were stained and left  
262 to dry before scanning, or they were taken directly from the stain and scanned. Because the whole stem  
263 samples are used for LATscan and due to stiffness of most woody stems, some samples were treated longer  
264 than usual when compared to the above microscopic anatomical methods. To determine the stains infiltration  
265 time, we stained different samples of *Wisteria sinensis*, the stiffest specimen in our sampling. We visually

266 observed the penetration of the dye into the samples, and then analyzed hand sections using confocal  
267 microscopy (Supporting information Fig. S1). For blocks 1x1x1 cm wide of *Wisteria*, we soaked samples in  
268 Safrablau for one week or more to give enough time for the stain to infiltrate through the whole sample.  
269 Calcofluor White was tested from one hour up to one day. This dye infiltrated faster in samples of similar size  
270 stained with Safrablau and were scanned maximum after one day using confocal microscopy. Similar  
271 staining procedures were repeated for LATscan. For the combined safranin + calcofluor treatment, we first  
272 soaked the samples in safranin, washed in 50% ethanol, and then stained with calcofluor in the dark.  
273 Samples were rinsed at least a few times in distilled water to wash the excess of Calcofluor.

274

#### 275 Cell wall fluorescence

276 To quantify the different fluorescence signals of cell walls, we compared cells whose major  
277 components of cell walls are lignin or suberin. We compared the chemical composition of cell walls of  
278 vessels, G-fibers, and sclerenchyma (lignified pericyclic cells, sclereids and lignified pith cells) to represent  
279 lignified tissue, as well as suber and cells in the chemical boundary of the heartwood-sapwood border of  
280 *Wisteria sinensis* to represent suberized tissue. We imported images into ImageJ and used the Multi-point  
281 Tool to measure the mean fluorescence intensity of 15 individual cell walls representing each of the seven  
282 cell types. Data were plotted as a violin plot in R (R Core Development Team., 2021). We tested for  
283 differences in emission wavelength means using one-way ANOVA followed by Tukey's *post hoc* test of  
284 honest significant differences (HSD). Values are the mean and  $P < 0.05$  was considered statistically  
285 significant.

286

#### 287 Results

288 LATscan is an efficient tool for anatomical studies of woody plants. Our comparisons between  
289 unstained and stained samples showed that stained samples with Safranin, Calcofluor or the combination of  
290 both dyes did not improve the resolution of images for anatomical investigation (Supporting information Fig.  
291 S2). Therefore, below, we describe the application of LATscan for anatomical studies based mostly on  
292 unstained samples.

293

294 LATscan yields high-quality 3D reconstructions of complex woody stems under different developmental  
295 stages

296 3D reconstructions of young stems of *Paullinia pinnata*, a woody vine from the maple family,  
297 LATscan clearly illustrates the complex anatomy of these stems, which have the formation of multiple  
298 vascular cylinders originating in different lobes of the young stem (Fig. 3a-c). LATscan also successfully  
299 imaged the complex dynamics of older stems in *P. pinnata*, where the peripheral vascular cylinders undergo  
300 anastomoses (Fig. 3d-i) – connections between different portions of the vascular tissues – at the nodal  
301 region of the stem (see also Movie S1). 3D reconstructions were also generated for stems of other woody  
302 vines with various stem types including stiff samples such as in *Wisteria floribunda*, stems with successive  
303 cambia (i.e., multiple increments of secondary xylem and secondary phloem formed in a successive fashion)  
304 as in *Gnetum urens*, as well as semi-woody vines with large rays (parenchymatic tissue) such as in *Cocculus*  
305 *orbiculatus* and *Menispermum canadense* (Movie S2).



306  
307  
308  
309  
310  
311  
312  
313  
314  
315  
316  
317  
318  
319  
320  
321  
322

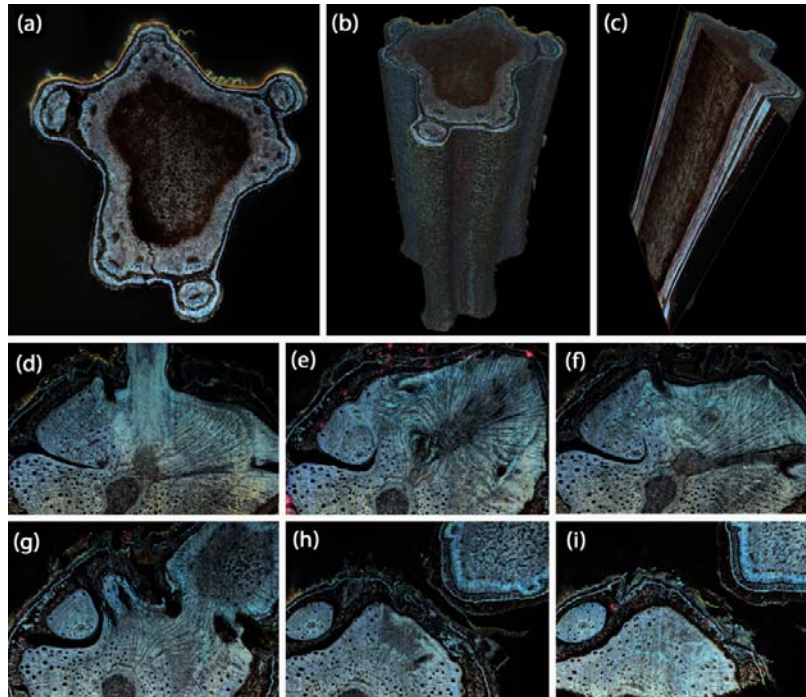

323 **Fig. 3** LATscan of the compound stem of the woody vine *Paullinia pinnata* (Sapindaceae). (a-c) Young stem  
324 with compound cylinder. Stem diameter: 8 mm. (a) Cross section of the stem in 2D, showing the central  
325 vascular cylinder and three peripheral vascular cylinders. (b) 3D reconstruction of the stem. (c) Longitudinal  
326 radial view of the stem (computationally sliced), showing mostly pith cells. (d-i) LATscan of the compound  
327 stem of the woody vine *Paullinia pinnata* showing anastomoses and splitting between vascular cylinders.  
328 Stem diameter: 18 mm.

329  
330 LATscan generates substantial structural data for gross stem anatomy descriptions

331 To assess the potential of LATscan for gross stem anatomy (position of major tissues), we compared  
332 images generated through the macroscopic and microscopic methods with LAT images (Fig. 4a-i). From the  
333 macroscopic analyses, we observed the main tissues of the stem, including the wood (secondary xylem) and  
334 inner bark (secondary phloem), as well as the distribution of vessels, rays, and successive cambia (Fig.  
335 4a,e,i). By comparison, LATscan reveals the position of secondary xylem, secondary phloem, and  
336 successive cambia like macroscopic images, however they have the additional benefit of more clearly  
337 distinguishing the position of the epidermis/periderm, cortex, pericycle, and pith (Fig. 4c,g,k). For example,  
338 the macro of *Gnetum urens* is mostly homogenous in color (Fig. 4e), yet the LATscan has high contrast to  
339 differentiate this tissue (Fig. 4g). Taken together, these observations indicate that LATscan reveals the same  
340 gross stem anatomy features as obtained through the macroscopic method, yet with finer-scale details to  
341 differentiate cell and tissue types.

342 From the light microscopy analyses, we obtained finer details in comparison to macroscopic images,  
343 allowing the distinction of cell types (e.g., parenchyma, fibers, vessels) and their shape, size, and distribution  
344 of cells (Fig. 4b,f,j). Specifically, light microscopy images revealed, for instance, the phloem cells in *Coccolulus*  
345 *orbiculatus* (Fig. 4b) that was identified only as brown patches by macroscopic (Fig. 4a), the presence of  
346 gelatinous fibers in the phloem, sclereids in the rays, and fibrous pericycle in *Gnetum urens* (Fig. 4f) and the  
347 stratified arrangement of fibers alternating with other cell types in the secondary phloem and fibrous

348 pericycle of *Wisteria floribunda* (Fig. 4j). By comparison, LATscan also reveals these fine details, capable of  
349 also differentiating vessels from parenchyma from fibers, with the added benefit of differential  
350 autofluorescence (see cell wall composition results below).

351

352

353

354

355

356

357

358

359

360

361

362

363

364

365

366

367

368

369

370

371

372

373

374

375

376

377

378

379

380

381

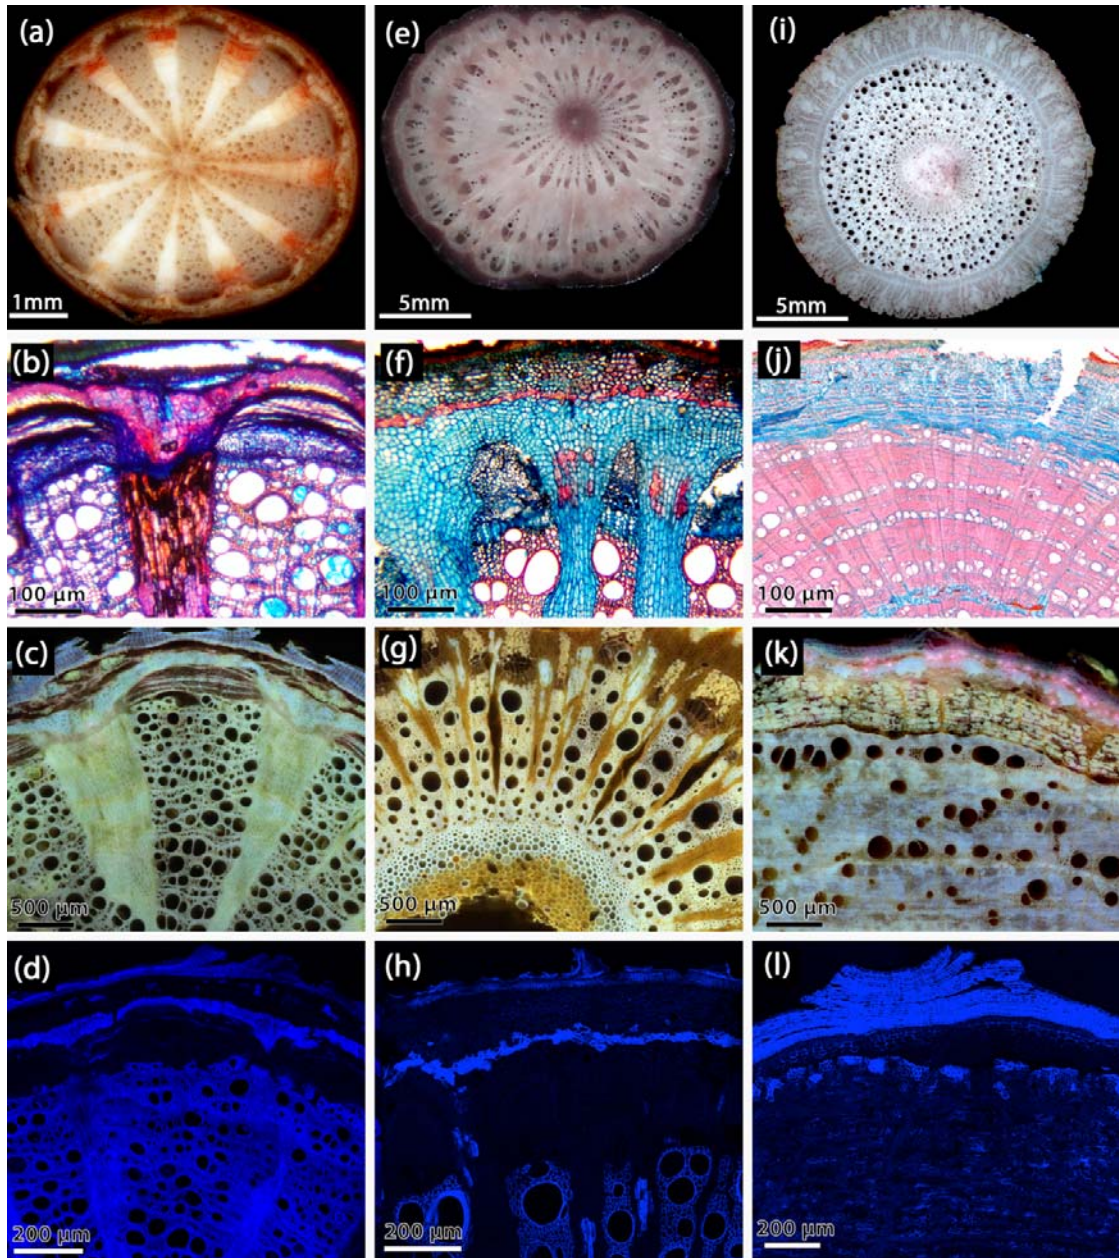

382

383

384

385

386

387

388

389

**Fig. 4** Comparison of cross section images processed for macroscopic analyses, light microscopy and LATscan of woody vines with various anatomical complexity. (a,e,i) Macroscopic images showing mature stems. (b,f,j) Light microscopy, stained with Safrablau. (c,g,k) LATscan of mature stems. Stem diameter: 8 mm, 10 mm, 10 mm, respectively. (d,h,l) Autofluorescence using Laser Confocal Scanning Microscopy (excitation wavelength 405 nm). (a-d) *Cocculus orbiculatus* (Menispermaceae). (e-h) *Gnetum urens* (Gnetaceae). Note G-fibers in the secondary phloem in (f) and (g), and lignified pith cells in (g). (i-l) *Wisteria* spp. (Fabaceae). (i) *Wisteria sinensis* (Ithaca Commons). (j) *Wisteria floribunda*. (k) *Wisteria sinensis* (Cornell Botanic Gardens). (l) *Wisteria floribunda*.



390 LATscan is a powerful tool for secondary xylem and secondary phloem qualitative and quantitative anatomy  
391 To investigate the potential of LAT for wood and inner bark anatomy, we compared images  
392 generated through light microscopy method to LAT images. We used vines with various degrees of  
393 woodiness, diversity stem types (regular growth vs. vascular variants), and periderms.  
394 Microscopic methods are particularly challenging with woody stems, as it requires sectioning plants in three  
395 faces (i.e., transverse, longitudinal radial, longitudinal tangential) to understand the 3D structure. However,  
396 with LATscan we can generate 3D reconstructions  
397 (Fig. 5; Movie S2), and re-oriented them to  
398 computationally slice through the sample in either  
399 transverse, radial or tangential view to characterize  
400 wood and bark anatomy accordingly (Fig. 5, 6).  
401 Using this method, we can note that in cross section  
402 the wood of *Cocculus orbiculatus* (Fig. 6a) and  
403 *Gnetum urens* (Fig. 6b) are characterized by  
404 relatively large vessels embedded in a background  
405 of lignified cells, with large parenchymatic rays.  
406 Sclerenchymatic cells are observed in the rays of  
407 *Gnetum urens* (Fig. 6b). *Wisteria sinensis* has  
408 growth rings, porous wood (large vessels in the early  
409 wood), and a matrix of parenchymatic cells and  
410 fibers surrounding the vessels (Fig. 6c-d). Tyloses  
411 are common in large vessels of *W. sinensis* (Fig. 6c-  
412 d) and the heartwood that appeared as a dark core  
413 with macroscopic method (Fig. S3) became  
414 anatomically visible with LAT like the rest of the stem  
415 (Fig. 6d). Note uniseriate rays and axial parenchyma  
416 strands in longitudinal tangential sections of oak (Fig.  
417 6c). We used high-resolution volume renderings to  
418 quantify the number and proportion of vessels in  
419 *Urvillea chacoensis* (Fig. 7a) using ImageJ (Fig. 7b)  
420 and Avizo (Fig. 7c). We found that the cross-section  
421 investigated using ImageJ (Fig. 7b) have 55 large  
422 vessels (diameter >50  $\mu\text{m}$ ), corresponding to nearly  
423 20% of the total cross-section (Fig. 7b). Vessels  
424 varied from 53  $\mu\text{m}$  to 230  $\mu\text{m}$  wide (Dataset S1). This  
425 type of analysis can be performed for different  
426 purposes, as images can be virtually dissected, in  
427 any dimension, from the 3D reconstruction (Fig. 7c).  
428  
429  
430

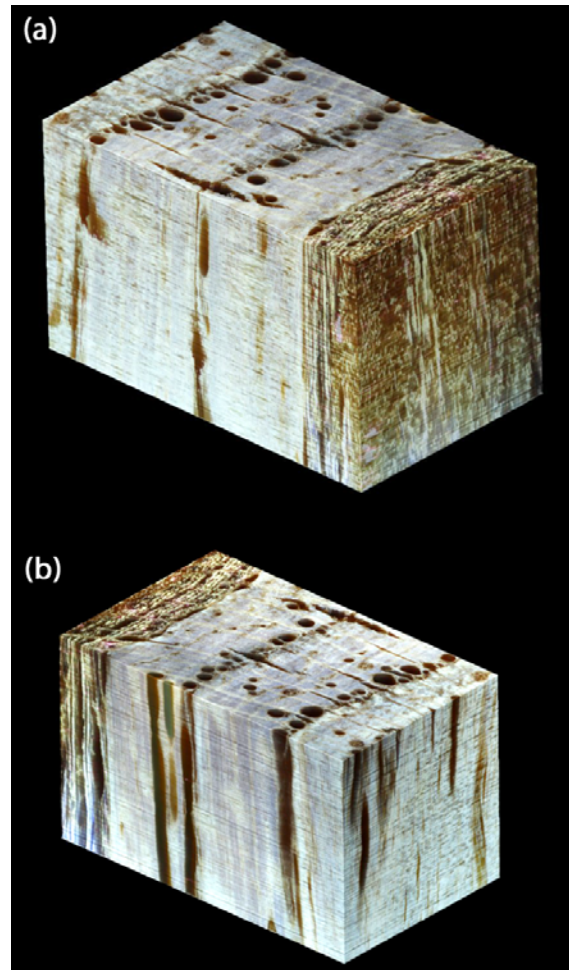

**Fig. 5** Schematic wood block showing three section planes of *Wisteria sinensis*, reconstructed from LATscan. (a) Top view showing the bark in front view, radial plane (lateral view) and cross view (top). (b) Top view showing the tangential view of the wood (front view), radial plane (lateral view) and cross view (top). Block dimensions: 2.5 x 1.5 x 1.6 mm<sup>3</sup>, with a voxel size of 1 x 1 x 5 micron<sup>3</sup>.



431  
432  
433  
434  
435  
436  
437  
438  
439  
440  
441  
442  
443  
444  
445  
446  
447  
448  
449  
450  
451  
452  
453  
454  
455  
456  
457  
458  
459  
460  
461  
462  
463  
464  
465  
466  
467  
468  
469  
470  
471  
472  
473  
474  
475  
476  
477  
478  
479  
480  
481  
482  
483  
484  
485  
486  
487  
488  
489  
490

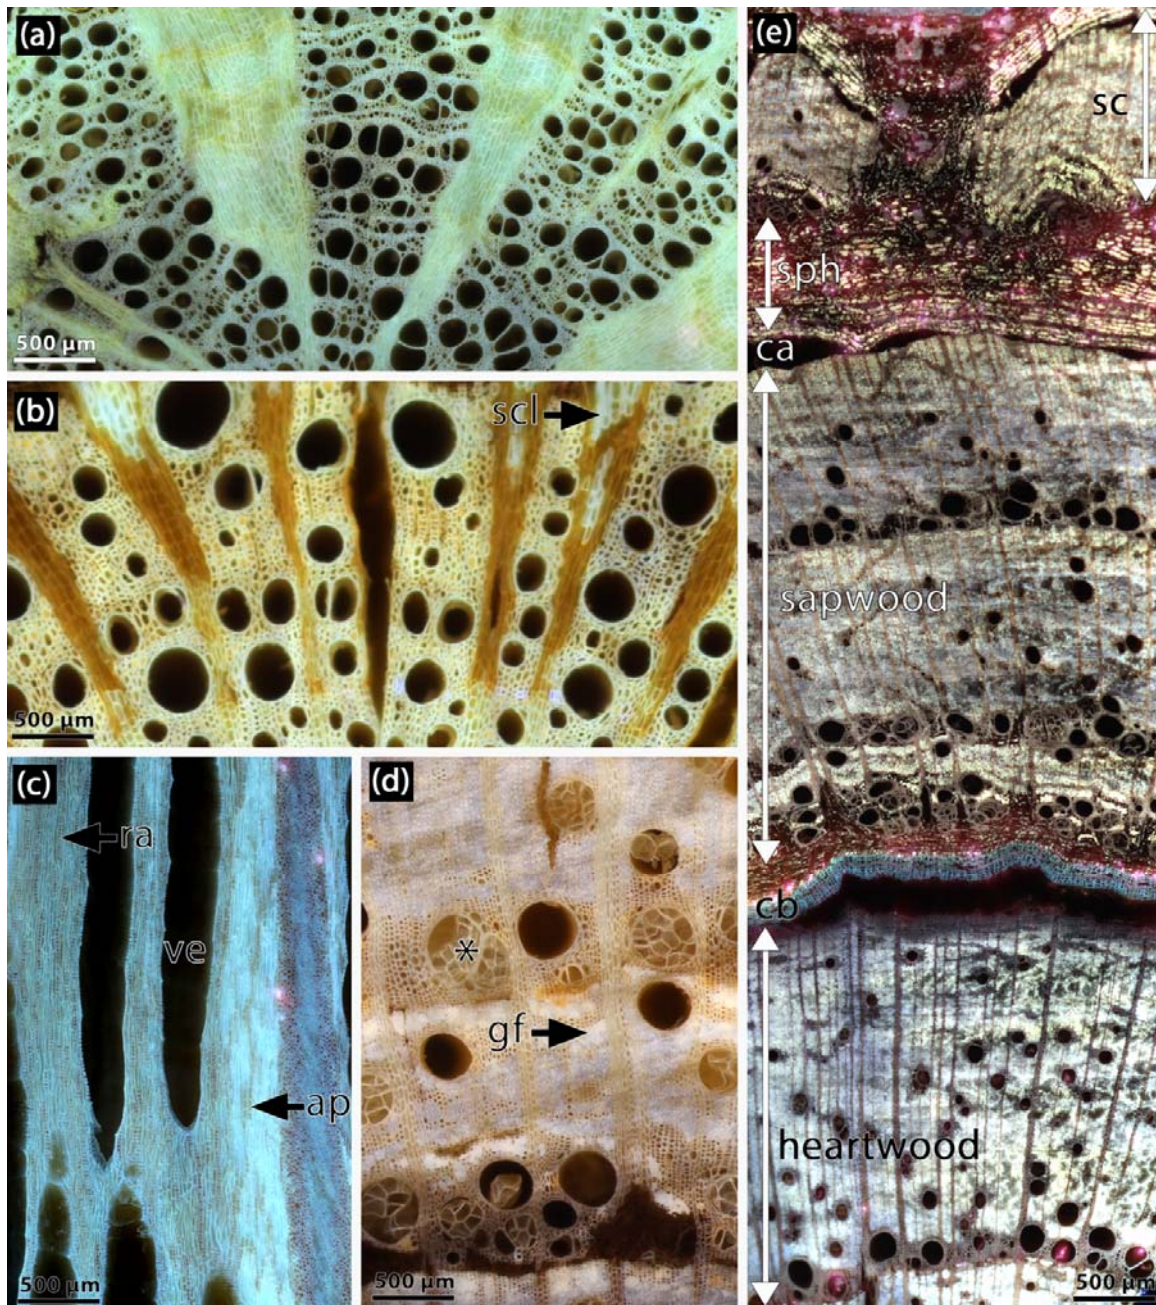

**Fig. 6** LATscan of woody vines illustrating wood anatomical features. (a) *Cocculus orbiculatus* (Menispermaceae) – wood has indistinct growth rings, wide and narrow vessels solitary or in multiples of two; large rays are formed by parenchymatic cells. (b) *Gnetum urens* (Gnetaceae) – wood with indistinct growth rings, diffuse-porous and solitary vessels; vessels are distributed in a background of fibrous cells; large parenchymatic rays are observed, with groups of lignified parenchyma cells (sclereids). (c) *Quercus rubra* (Fagaceae) – longitudinal tangential section showing short uniseriate rays, axial parenchyma, and vessels. (d-e) *Wisteria sinensis* (Fabaceae). (d) Note ring-porous wood with large vessels produced at the beginning of the growing season, tyloses in large vessels (asterisk), and two types of fibers, the regular fusiform fibers (larger lumen) which intermix with parenchymatic cells, and g-fibers with smaller diameter and a blurry white aspect in this image. (d). General view of a mature stem showing heartwood and chemical boundary (compartmentalization zone with suberized cells), sapwood with growth rings, secondary phloem, and new increments of vascular tissue (successive cambia). ap, axial parenchyma; ca, cambium; cb, chemical barrier (compartmentalization zone); gf, g-fibers; ra, vascular ray; scl, sclerenchyma; sph, secondary phloem; ve, vessel.



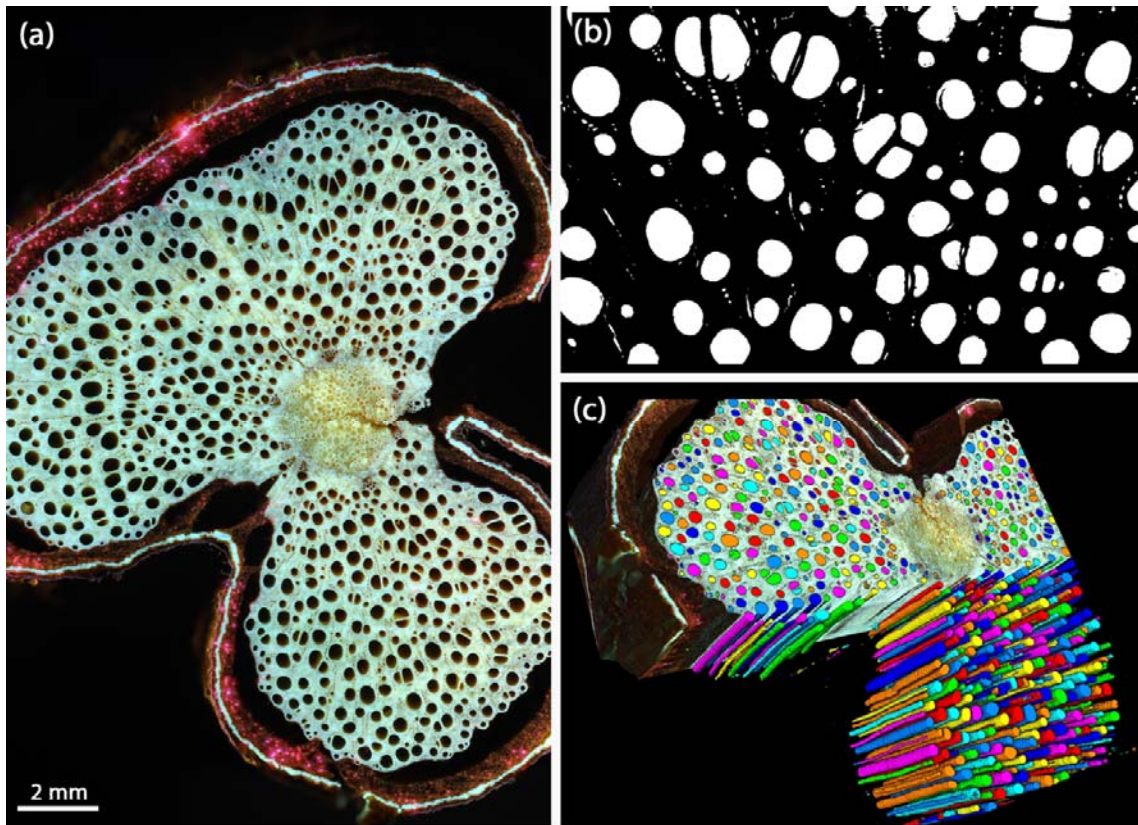

492 **Fig. 7** Anatomical images of the stem and wood of *Urvillea chacoensis* (Sapindaceae). (a) Original image  
493 generated by LATscan. (b) Binary image after performing threshold analyses using ImageJ, which is the  
494 basis for quantifying anatomical features such as vessel diameter. (c) Image after performing quantification  
495 analysis using AVIZO.  
496

497 The bark is divided into inner bark or secondary phloem, and outer bark that includes the pericycle,  
498 cortex, epidermis and/or periderm. As for the wood, LATscan revealed different cell types present in these  
499 tissues (Fig. 8Aa-e). Conducting cells of the phloem and the sieve-tube shape are still observed along with  
500 other parenchymatic cells (Fig. 8a-b,e). Sclerenchyma associated with the phloem is also revealed (Fig.  
501 8a,e), including G-fibers in *Gnetum urens* (Fig. 8b) and *Wisteria sinensis*, where they form seemingly  
502 alternate bands with other cell types (Fig. 8c). The pericycle (Fig. 8c), cortex (Fig. 8b,e) and periderm (mostly  
503 the suber) are also discernible, especially due to their different fluorescent signals (see results below).  
504

505 LATscan is a proxy for cell wall composition given their distinct fluorescent signals

506 To investigate the potential of LAT to reveal cell wall composition, we compared fluorescent signals  
507 from confocal autofluorescence microscopy (imaged with 405 nm, 488 nm and 561 nm) of both unstained  
508 and stained samples (Fig. 4d, h, i; Fig. S1) to LATscan (Figs 4, 6, 8). Across all species, confocal analysis  
509 detects a strong autofluorescence (excitation at 405 nm) of lignified cells (e.g., fibers, vessels, pericycle) and  
510 suberized cells (e.g., suber) (Fig. 4d,h,i). This indicates that lignin fluorescence is similar to suberin with  
511 intense blue fluorescence under UV excitation (Fig. 4d,h,i; Fig. S1). In general, LATscan displayed different  
512 fluorescent signals for cell types with distinct cell wall composition. The differences are here described  
513 qualitatively and quantitatively. In unstained samples, xylem fibers and vessels (cells with thick, lignified



514 walls) have a similar signal (Fig. 4c,f,i). G-fibers, which have an additional layer of cellulose that later mature  
515 into a lignified layer, have a particular fluorescent signal, which may vary from a golden color in the  
516 secondary phloem and cortex of *Gnetum urens* (Fig. 8C), while in *Wisteria sinensis* they display a whitish or  
517 bluish color in the wood (Fig. 4k) and bark (Fig. 8d) respectively. Pericyclic fibers (Fig. 4c, 4f; 8a-c), lignified  
518 pith cells (Fig. 4i) and sclereids (Fig. 4i, 8c), which are parenchymatic cells that later become lignified, have a  
519 similar bright white fluorescent signal across species. Suberin-rich cells in the periderm (Fig. 4c, 4f, 8a, 8c)  
520 or in the chemical boundary of the transition from heartwood to sapwood in *Wisteria sinensis* (Fig. 6a)  
521 display a blue-ish fluorescent signal. In all species, parenchymatous cells (pith, axial and radial parenchyma,  
522 cortex) have a particular fluorescent signal (4c,g,k) differentiating them from sclerenchyma, vessels or  
523 periderm.

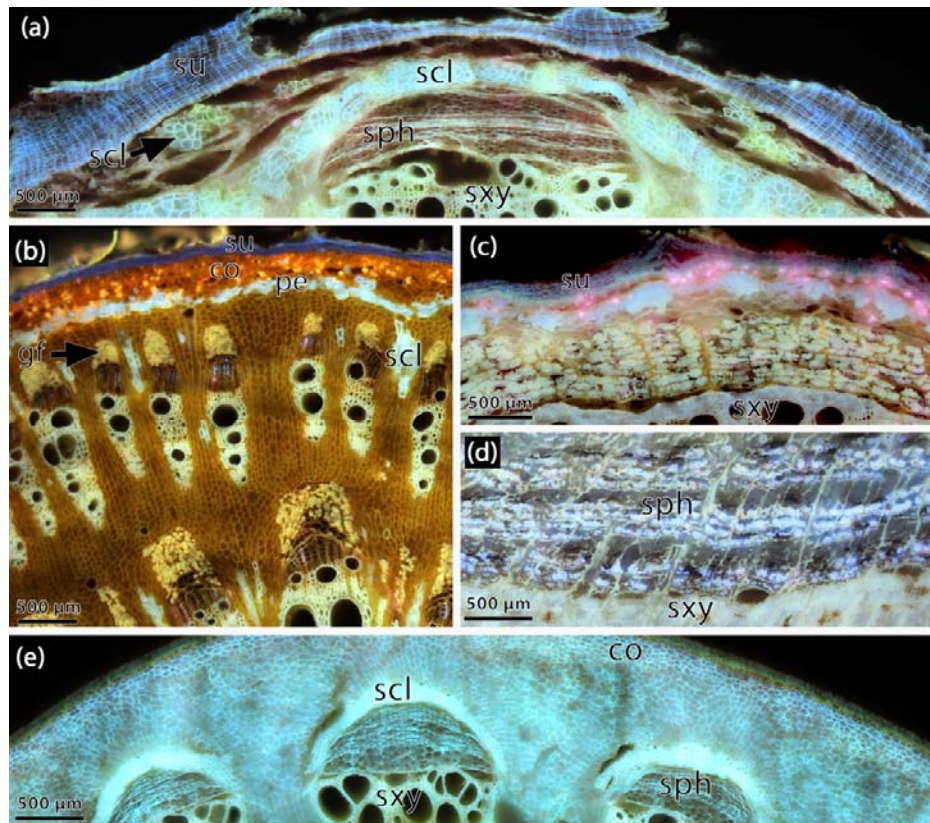

555 **Fig. 8** LATscan of woody vines illustrating bark anatomical features. (a) *Cocculus orbiculatus*  
556 (Menispermaceae) – secondary phloem formed by thin-walled cells (sieve-tube elements and parenchyma),  
557 continuous multiseriate and fibrous pericycle, lignified cluster of cells in the cortex, periderm with several  
558 layers of suber. (b) *Gnetum urens* (Gnetaceae) – secondary phloem formed by thin-walled cells (sieve-tube  
559 elements and parenchyma) is opposed to conducting cells of the secondary phloem which are separated by  
560 large rays; sclereids are present in the rays. Also note continuous fibrous pericycle, cortex and periderm with  
561 few layers of suber. (c) *Wisteria sinensis* (Fabaceae) – secondary phloem formed by alternating bands of  
562 fibers with sieve-tube elements and parenchyma. (d) *Menispermum canadense* (Menispermaceae) –  
563 secondary phloem formed by thin-walled cells (sieve-tube elements and parenchyma) is opposed to  
564 conducting cells of the secondary phloem which are separated by large rays. co, cortex; gf, g-fibers; scl,  
565 sclerenchyma; sph, secondary phloem; su, suber; sxy, secondary xylem.

566 The fluorescence intensity for the main cell types were determined to investigate the different  
567 fluorescent signals. Across species, the analysis showed a mean fluorescence range of 50-129 nm for

568 vessels, 49-181 nm for sclerenchyma, 106-144 nm for G-fibers, 35-158 nm for suber and 74-105 nm for  
569 boundary layer in the heartwood-sapwood border (Dataset S2). Among lignified cells, there was a  
570 statistically significant difference in mean fluorescence signals between at least three groups (one-way  
571 ANOVA,  $df=4$ ,  $F=40.06$ ,  $P<0.001$ ). Tukey's HSD Test for multiple comparisons found that the mean value  
572 of suber was significantly different between vessels, G-fibers, and sclerenchyma ( $P<0.001$ ) (Fig. 9). There  
573 was no statistically significant difference between suber and heartwood (the chemical boundary of *Wisteria*  
574 *sinensis*) ( $P=0.98$ ), and between heartwood and vessels ( $P=0.47$ ) (Fig. 9).

575

576

577

578

579

580

581

582

583

584

585

586

587

588

589

590

591

592

593

594

595

596

597

598

599

600

601

602

603

604

605

606

607

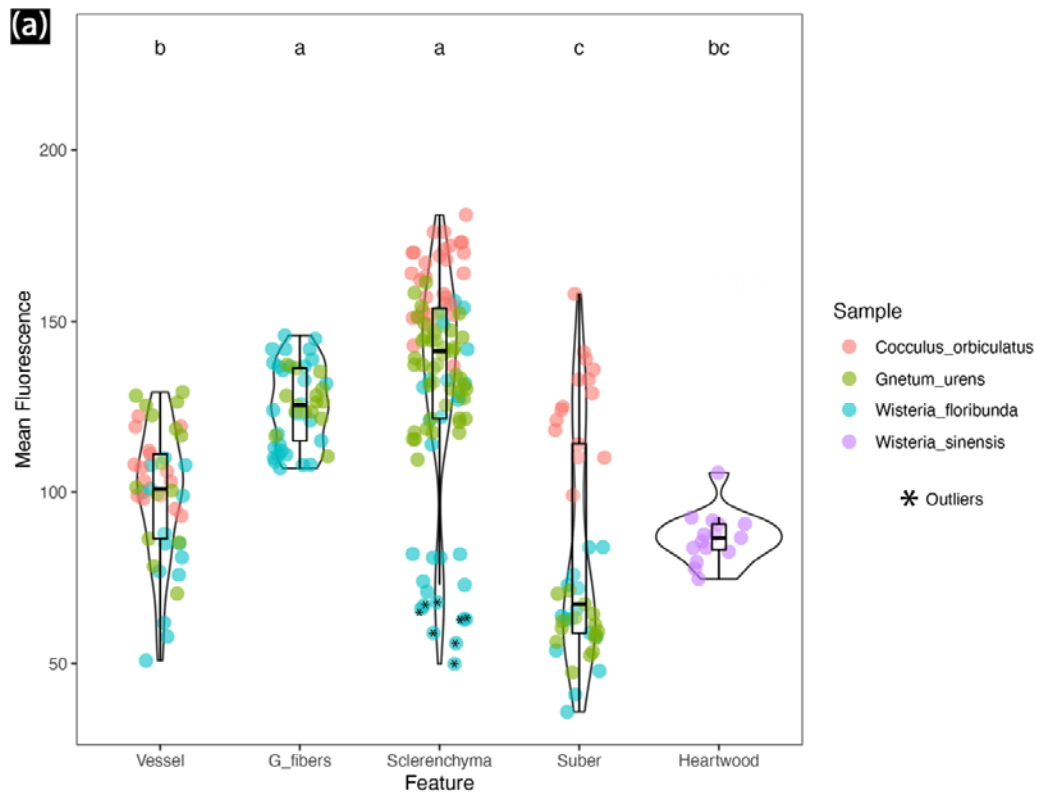

**Fig. 9** Violin plot of emission wavelength measurements for different cell types analyzed from tree species of woody vines. Different letters indicate significant difference by one-way ANOVA ( $P<0.05$ ). G-fibers are absent in *Cocculus orbiculatus*. Heartwood was present only in *Wisteria sinensis*.

## 600 Discussion

601 With the rebirth of comparative plant morphology, there is an increased amount of research focusing  
602 on micromorphological studies as plant scientists pursue the question on how organisms evolved and  
603 diversified. To understand such morphological complexity of plants, various techniques have been  
604 developed or improved to facilitate plant phenotyping (Legland *et al.*, 2018; Strock *et al.*, 2022). Here, we  
605 tested LATscan, a new imaging technology applied in plant sciences, to demonstrate its potential as an  
606 alternative tool for qualitative, quantitative, and high-throughput research of woody plants.

LATscan is a fast and versatile technique for anatomical studies of woody plants

608 Compared to other techniques, LATscan is an excellent tool for anatomical research for different  
609 reasons. First, it is a faster, high throughput technique that produces high-quality 3D reconstructions as well  
610 as 2D images suitable for plant anatomical studies. Previous studies demonstrated that LATscan can  
611 provide high throughput data of roots, shoots, and inflorescences from herbaceous plants (Strock *et al.*,  
612 2019; Martínez-Gómez *et al.*, 2022). Here we demonstrated that this technology is also adequate for woody  
613 (stiff) samples. LATscan enabled 3D reconstructions of stem samples in different developmental stages,  
614 including plants with different degrees of woodiness, habits and from distant lineages of seed plants  
615 (gymnosperms and angiosperms). In general, these 3D reconstructions presented higher quality and  
616 resolution if compared to other woody stems scanned by X-ray microtomography which can be applied both  
617 to dead samples (see Table S1) or in vivo (e.g., to study vessel embolism in woody plants - Brodersen *et al.*,  
618 2010; Cochard *et al.*, 2015). We believe that in addition to woody samples, LATscan may be suitable for the  
619 study of complex systems involving the association of multiple organisms, such as plant-pathogen  
620 interactions and the interaction of haustoria of parasitic plants with host plants.

621 The second reason why LATscan facilitates the study of woody anatomical tissues is because it  
622 generates from a single scan information on qualitative, quantitative, and chemical composition of cells and  
623 tissues. Qualitatively, the resolution of images allowed cells and tissues to be properly described, similar to  
624 the results obtained by images originated from histological slides using light microscopy (See Table S1). We  
625 evaluated different species, which are anatomically distinct in terms of distribution and abundance of cell  
626 types encompassing stiff and soft tissues (see Fig. 4). This broader sampling permitted to compare diverse  
627 wood types, indicating that LATscan presents consistent results independent of wood stiffness. In general,  
628 light microscopic images of histological slides yield additional details at the cellular and tissue level that  
629 might be unnoticed in macroscopic analysis. Here, we demonstrated that LATscan can generate enhanced  
630 data over these two techniques, as was demonstrated for the structural and chemical wall composition of the  
631 boundary tissue in the transition of heartwood and sapwood in stems of *Wisteria sinensis*. These cells with  
632 unusual arrangement and a blue, fluorescent signal similar to suberized cells in the periphery was  
633 interpreted as chemical boundary or barrier zone (compartmentalization system). This phenomenon  
634 comprises the formation of structural and chemical barriers in the wood after injuries, wounding, or both,  
635 which may function as a protective mechanism against pathogens (Pearce, 1996; Spicer, 2005;  
636 Schweingruber, 2007). Our results on fluorescence emission wavelength (see discussion below)  
637 corroborates that a major deposition of suberin (instead of lignin) occur in these cells, which is one of the  
638 metabolites that may be synthesized by living cells in response to wood injuries (Pearce & Rutherford, 1981;  
639 Spicer, 2005). LATscan also proved useful for quantitative wood anatomy, using 2D images for automatic  
640 image analysis of wood structure, similar to how histological slides are analyzed (Scholz *et al.*, 2013;  
641 Ziemińska *et al.*, 2015; Von Arx *et al.*, 2016).

642 Lastly, LATscan enabled the identification of cell types with distinct cell wall compositions as a result  
643 of contrasting fluorescence signals emitted from these tissues. Our analysis demonstrated that there is a  
644 qualitative and quantitative consistency in the pattern of spectral variation, which helped to pinpoint different  
645 cell wall components (e.g., lignin, suberin, cellulose). Specifically, statistical analysis helped differentiating  
646 suberized and lignified cells across stem types, while mean fluorescence of different types of lignified cells  
647 (e.g., pericyclic fibers, sclereids) were not statistically different, which might be explained by the different but

648 continuous levels of lignification in these tissues. We noted that G-fibers which occur in *Wisteria* species (in  
649 the wood and bark), and in the bark of *Gnetum urens* had a wide qualitative range in the fluorescent signal,  
650 varying from white to blue and gold, but were not statistically different from each other. Biologically, these  
651 results may be explained by the different maturation stages of G-fibers, which arise as mainly cellulosic, but  
652 can undergo delayed lignification; indeed numerous species have been shown to have lignified G-fibers  
653 (Ghislain & Clair, 2017).

654 The assessment of chemical cell wall composition through direct visualization of spectral bands have  
655 been reported using different systems, such as histochemical analysis through autofluorescence using  
656 confocal microscopy (Hutzler *et al.*, 1998; Donaldson & Williams, 2018) or chemical imaging by confocal  
657 Raman microscopy (Gierlinger & Schwanninger, 2006). For instance, Donaldson & Williams (2018) used  
658 autofluorescence to characterize the variation in cell wall components including lignin and suberin from  
659 healthy, chlorotic, and necrotic pine needles. Similarly, several studies have highlighted the usefulness of  
660 cell wall autofluorescence for wood science, because wood cells are naturally fluorescent mostly due to the  
661 presence of lignin (Donaldson, 2013; Maceda & Terrazas, 2022). Examples of such studies include the  
662 assessment of differences in lignin composition and localization of polysaccharides in the cell wall of normal  
663 and compression wood (Donaldson & Knox, 2012; Donaldson & Radotic, 2013) or the topochemical  
664 characterization of fibrous, dimorphic and non-fibrous stems of cacti based on lignin composition/ratio  
665 (Maceda *et al.*, 2019). In general, these studies highlight that fluorescence spectra through confocal  
666 microscopy can help to investigate anatomy in different contexts with the advantage of not having to apply  
667 the laborious traditional workflow (e.g., embedding, sectioning, staining) used for plant anatomical studies.  
668 Because LATscan enabled direct visualization of the spatial variation of some (lignin and suber) cell wall  
669 components without any chemical treatment or staining of cell walls, it can be considered another tool to  
670 facilitate the integration of histology and chemical analysis of cell walls in plants. In addition to gross  
671 anatomy, this approach may be particularly useful for studying complex systems such as wounding  
672 experiments (e.g., grafting), plant-pathogen associations or parasitic plants-host interactions, which normally  
673 requires complementary chemical analysis (e.g., histochemistry, fluorescence microscopy) to identify tissues  
674 that are specific to the pathogen/parasitic plant or host plant, or to differentiate chemical compounds  
675 deposited in boundary layers of wounded plants (Rittinger *et al.*, 1987; Rath *et al.*, 2014; Navarro *et al.*,  
676 2019; Pellissari *et al.*, 2022).

677

678 The limitations of LATscan for plant anatomical studies

679 Most plant phenotyping techniques are destructive, and LAT is no different. Although LATscan  
680 allowed the adequate observation of most woody tissues, and in some cases improved the resolution of  
681 some structures (e.g., heartwood), in other cases the scanning was not efficient to perfectly illustrate the  
682 complexity of cell structures. For example, the resolution of vessels, parenchyma, sclerenchyma is adequate  
683 for studies at the tissue and cell levels, but g-fibers resulted in blurry cell patches in some cases. G-fibers  
684 have lignified outer secondary cell-wall layers, and a thick internal layer, the G-layer, that is formed mostly by  
685 cellulose (~75% Mellerowicz & Gorshkova, 2012) that only later can become lignified (Guedes *et al.*, 2017).  
686 Because the G-layer is rich in non-structural polysaccharides such as pectin, the G-fiber cell wall forms a  
687 gel-like structure (Clair *et al.*, 2008). This cell wall composition gives G-fibers a highly hydrophilic



688 composition, and G-layers can easily shrink as moisture decreases (Clair *et al.*, 2008; Guedes *et al.*, 2017),  
689 which may generate the blurry aspect in LATscan.

690 Another limitation presents in the 3D reconstructions shown in Figure 5. In the axial direction of the  
691 blocks, striations are visible that make the longitudinal resolution not as sharp as the cross-sectional images.  
692 There are two reasons for this. First, the cross-sectional image at the laser ablation plane resolutions results  
693 in a resolution of 1  $\mu\text{m}/\text{pixel}$ , whereas the sections are separated by 5  $\mu\text{m}$ , thus leading to a reduced  
694 resolution in the longitudinal direction. Second, the UV-induced fluorescence is similar but not exactly the  
695 same in each section, which results in slight differences that manifest as these striations. The use of lasers  
696 with smaller pulse durations (we used a nanosecond pulsed laser in this study) in the picosecond and  
697 femtosecond range would help alleviate this issue with finer resolution in the longitudinal direction and more  
698 uniformity in the UV-induced fluorescence between sections.

699 Other disadvantage of LATscan compared to traditional anatomy is that, as a new technology, it may  
700 not be cost-effective compared to other traditional techniques (e.g., light microscopy). Nevertheless, as  
701 LATscan generate multiple data (2D, 3D, chemical composition information), a comparison in terms of cost  
702 would require including a full combination of techniques to acquire the same amount of data using traditional  
703 methods. In addition, 3D reconstructions are only possible using modern techniques (e.g., confocal laser  
704 scanning microscope, X-ray microtomography, magnetic resonance imaging) which might be equally not as  
705 cost-effective or cheaper. Here we optimized the application of LATscan for woody tissues which were  
706 obtained from stems with maximum diameter of 20 mm. However, such limitations regarding sample size are  
707 also real for nearly all other classical methods using microtomy and microscopy.

708

## 709 **Conclusions**

710 The systematic approach described in this article opens new possibilities in the study of plant  
711 phenotyping. Laser ablation tomography (LATscan) is an innovative technique that allows for prompt, 2D and  
712 3D image reconstructions of plant samples, offering new avenues to explore the complexity of plant  
713 morphology. This new technology will be particularly significant to filling in the gap of sample throughput that  
714 is not achieved by conventional microscopy techniques. Future plant anatomical research woody plants will  
715 benefit from the power and efficiency of LAT scans to illuminate the development, structure, chemical  
716 diversity, and 3D phenotypical information which remains strongly underused in plant sciences. Such  
717 characterizations will strength both basic and applied research, allowing in-depth investigations to be  
718 undertaken in areas ranging from plant anatomy to systems biology.

719

## 720 **Data availability**

721 Data supporting the observations are largely presented in Supporting Information. Code and Dataset S2 are  
722 available at [github.com/joycechery/LATScans](https://github.com/joycechery/LATScans). Movies are available at Zenodo repository  
723 (10.5281/zenodo.7289450). More detailed information, if necessary, will be provided on request.

724

725

726

## 727 **Acknowledgments**



728 We would like to acknowledge the Arnold Arboretum of Harvard University for providing access to the living  
729 collections and financial support through a Sargent Award for Visiting Scholars (I.L.C.N). We thank Johanna  
730 M. Dela Cruz and the Cornell Institute of Biotechnology's Imaging Facility for the support with the Spinning  
731 Disk Confocal Microscope (NIH 1S10OD010605) and Zeiss LSM 710 Confocal Microscope (NIH  
732 1S10RR025502). This work was financially supported by Cornell University Lab Startup Funds (J.G.O). The  
733 work was also supported by University of Southern Maine startup funds provided by the Maine Economic  
734 Improvement Fund (A.L.).

735

#### 736 **Conflict of interest**

737 Benjamin Hall is an inventor of LATscan, as noted in patent US9976939B2.

738

#### 739 **Author contributions**

740 I.L.C.N. planned the research; I.L.C.N., B.H., A.L., J.B. and J.G.O. designed the research; I.L.C.N., B.H.,  
741 A.L. and J.G.O. performed the research; I.L.C.N., B.H., A.L. and J.G.O. collected data and analyzed the  
742 data; I.L.C.N. and J.G.O. interpreted the results; I.L.C.N. wrote the paper with inputs from B.H., A.L. and  
743 J.G.O. All authors read and approved the final version of the manuscript.

744

#### 745 **References**

746 **Barbosa ACF, Gerolamo CS, Lima AC, Angyalossy V, Pace MR. 2021.** Polishing entire stems and roots  
747 using sandpaper under water: An alternative method for macroscopic analyses. *Applications in Plant*  
748 *Sciences* **9**: 1–9.

749 **Barbosa ACF, Pace MR, Witovisk L, Angyalossy V. 2010.** A new method to obtain good anatomical slides  
750 of heterogeneous plant parts. *IAWA Journal* **31**: 373–383.

751 **Bastos CL, Tamaio N, Angyalossy V. 2016.** Unravelling roots of lianas: A case study in Sapindaceae.  
752 *Annals of Botany* **118**: 733–746.

753 **Brodersen CR. 2013.** Visualizing wood anatomy in three dimensions with high-resolution X-ray micro-  
754 tomography (MCT) - A review. *IAWA Journal* **34**: 408–424.

755 **Brodersen CR, McElrone AJ, Choat B, Matthews MA, Shackel KA. 2010.** The Dynamics of Embolism  
756 Repair in Xylem: In Vivo Visualizations Using High-Resolution Computed Tomography. *Plant Physiology*  
757 **154**: 1088–1095.

758 **Carlquist S. 1982.** The use of Ethylenediamine in softening hard plant. *Stain Technology* **57**: 311–317.

759 **Clair B, Gril J, Di Renzo F, Yamamoto H, Quignard F. 2008.** Characterization of a Gel in the Cell Wall To  
760 Elucidate the Paradoxical Shrinkage of Tension Wood. *Biomacromolecules* **9**: 494–498.

761 **Cochard H, Delzon S, Badel E. 2015.** X-ray microtomography (micro-CT): a reference technology for high-  
762 resolution quantification of xylem embolism in trees: A reference method for xylem embolism. *Plant, Cell &*  
763 *Environment* **38**: 201–206.

764 **Cunha Neto IL, Martins FM, Somner GV, Tamaio N. 2018.** Successive cambia in liana stems of  
765 Paullinieae and their evolutionary significance in Sapindaceae. *Botanical Journal of the Linnean Society* **186**:  
766 66–88.

767 **Demarco D. 2017.** Histochemical analysis of plant secretory structures. In: *Methods in Molecular Biology*.  
768 Humana Press Inc., 313–330.

- 769 **Donaldson L. 2013.** Softwood and Hardwood Lignin Fluorescence Spectra of Wood Cell Walls in Different  
770 Mounting Media. *IAWA Journal* **34**: 3–19.
- 771 **Donaldson LA, Knox JP. 2012.** Localization of Cell Wall Polysaccharides in Normal and Compression  
772 Wood of Radiata Pine: Relationships with Lignification and Microfibril Orientation. *Plant Physiology* **158**:  
773 642–653.
- 774 **Donaldson LA, Radotic K. 2013.** Fluorescence lifetime imaging of lignin autofluorescence in normal and  
775 compression wood: FLUORESCENCE LIFETIME IMAGING OF LIGNIN AUTOFLUORESCENCE. *Journal of*  
776 *Microscopy* **251**: 178–187.
- 777 **Donaldson L, Williams N. 2018.** Imaging and Spectroscopy of Natural Fluorophores in Pine Needles.  
778 *Plants* **7**: 10.
- 779 **Ghislain B, Clair B. 2017.** Diversity in the organisation and lignification of tension wood fibre walls – A  
780 review. *IAWA Journal* **38**: 245–265.
- 781 **Gierlinger N, Schwanninger M. 2006.** Chemical Imaging of Poplar Wood Cell Walls by Confocal Raman  
782 Microscopy. *Plant Physiology* **140**: 1246–1254.
- 783 **Guedes FTP, Laurans F, Quemener B, Assor C, Lainé-Prade V, Boizot N, Vigouroux J, Lesage-**  
784 **Descauses MC, Lepié JC, Déjardin A, et al. 2017.** Non-cellulosic polysaccharide distribution during G-layer  
785 formation in poplar tension wood fibers: abundance of rhamnogalacturonan I and arabinogalactan proteins  
786 but no evidence of xyloglucan. *Planta* **246**: 857–878.
- 787 **Haberlandt GFJ. 1914.** *Physiological plant anatomy*. London: Macmillan Co.
- 788 **Hafner BD, Tomasella M, Häberle K-H, Goebel M, Matyssek R, Grams TEE. 2017.** Hydraulic  
789 redistribution under moderate drought among English oak, European beech and Norway spruce determined  
790 by deuterium isotope labeling in a split-root experiment. *Tree Physiology* **37**: 950–960.
- 791 **Hall B, Lanba A. 2019.** Three-dimensional analysis of biological systems via a novel laser ablation  
792 technique. *Journal of Laser Applications* **31**: 022602.
- 793 **Hall B, Lynch J, Reutzel E, Lynch G. 2016.** 3D Laser Ablation Tomography.
- 794 **Hutzler P, Fischbach R, Heller W, Jungblut TP, Reuber S, Schmitz R, Veit M. 1998.** Tissue localization  
795 of phenolic compounds in plants by confocal laser scanning microscopy. *Journal of Experimental Botany* **49**:  
796 13.
- 797 **Johansen DA. 1940.** *Plant microtechnique*. New York: MacGraw-Hill Book.
- 798 **Kitin P, Nakaba S, Hunt CG, Lim S, Funada R. 2020.** Direct fluorescence imaging of lignocellulosic and  
799 suberized cell walls in roots and stems. *AoB PLANTS* **12**.
- 800 **Kukachka BF. 1977.** Sectioning refractory woods for anatomical studies.
- 801 **Legland D, Devaux MF, Guillon F. 2018.** Quantitative imaging of plants: multi-scale data for better plant  
802 anatomy. *Journal of Experimental Botany* **69**: 343–347.
- 803 **Lehnert MS, Lanba A, Reiter KE, Fonseca RJ, Minninger J, Hall B, Huff W. 2022.** Mouthpart adaptations  
804 of antlion larvae facilitate prey handling and fluid feeding in sandy habitats. *Journal of Experimental Biology*  
805 **225**: jeb244220.
- 806 **Li Y, Ruan Y, Kasson MT, Stanley EL, Gillett CPDT, Johnson AJ, Zhang M, Hulcr J. 2018.** Structure of  
807 the Ambrosia Beetle (Coleoptera: Curculionidae) Mycangia Revealed Through Micro-Computed  
808 Tomography. *Journal of Insect Science* **18**.

- 809 **Maceda A, Soto-Hernández M, Peña-Valdivia CB, Trejo C, Terrazas T. 2019.** Differences in the Structural  
810 Chemical Composition of the Primary Xylem of Cactaceae: A Topochemical Perspective. *Frontiers in Plant*  
811 *Science* **10**.
- 812 **Maceda A, Terrazas T. 2022.** Fluorescence Microscopy Methods for the Analysis and Characterization of  
813 Lignin. *Polymers* **14**.
- 814 **Martínez-Gómez J, Atluri TAM, Rose IJ, Holliday AJ, Stroock CF, Lynch JP, Miller WB, Stevenson**  
815 **DWm, Specht CD. 2022.** Developmental Morphology and Anatomy Shed Light on Both Parallel and  
816 Convergent Evolution of the Umbellate Inflorescence in Monocots, Underlain by a New Variant of Metatopy.  
817 *Frontiers in Plant Science* **13**.
- 818 **Mellerowicz EJ, Gorshkova TA. 2012.** Tensional stress generation in gelatinous fibres: a review and  
819 possible mechanism based on cell-wall structure and composition. *Journal of Experimental Botany* **63**: 551–  
820 565.
- 821 **Morrison WR, Lanba A, Hall B, Bruce A. 2020.** Novel implementation of laser ablation tomography as an  
822 alternative technique to assess grain quality and internal insect development in stored products. *Journal of*  
823 *Stored Products Research* **86**: 101552.
- 824 **Mozzi G, Romero E, Martínez-Quezada DM, Hultine KR, Crivellaro A. 2021.** PEG infiltration: An  
825 alternative method to obtain thin sections of cacti tissues. *IAWA Journal* **37**: 1–5.
- 826 **Mylo MD, Hofmann M, Delp A, Scholz R, Walther F, Speck T, Speck O. 2021.** Advances on the  
827 Visualization of the Internal Structures of the European Mistletoe: 3D Reconstruction Using  
828 Microtomography. *Frontiers in Plant Science* **12**.
- 829 **Navarro BL, Marques JPR, Appezzato-da- Glória B, Spósito MB. 2019.** Histopathology of Phakopsora  
830 euvitis on Vitis vinifera. *European Journal of Plant Pathology* **154**: 1185–1193.
- 831 **Pace MR. 2019.** Optimal preparation of tissue sections for lightmicroscopic analysis of phloem anatomy. In:  
832 Liesche J, ed. Phloem. Methods in Molecular Biology. New York: Springer protocols, Humana Press.
- 833 **Pearce RB. 1996.** Antimicrobial defences in the wood of living trees. *New Phytologist* **132**: 203–233.
- 834 **Pearce RB, Rutherford J. 1981.** A wound-associated suberized barrier to the spread of decay in the  
835 sapwood of oak (*Quercus robur* L.). *Physiological Plant Pathology* **19**: 359-381.
- 836 **Pegg TJ, Gladish DK, Baker RL. 2021.** Algae to angiosperms: Autofluorescence for rapid visualization of  
837 plant anatomy among diverse taxa. *Applications in Plant Sciences* **9**.
- 838 **Pellissari LCO, Teixeira-Costa L, Ceccantini G, Tamaio N, Cardoso LJT, Braga JMA, Barros CF. 2022.**  
839 Parasitic plant, from inside out: endophytic development in *Lathrophytum peckoltii* (Balanophoraceae) in host  
840 liana roots from tribe Paullineae (Sapindaceae). *Annals of Botany* **129**: 331–342.
- 841 **Prunet N, Jack TP, Meyerowitz EM. 2016.** Live confocal imaging of Arabidopsis flower buds.  
842 *Developmental Biology* **419**: 114–120.
- 843 **R Core Development Team. 2021.** R: A language and environment for statistical computing. R Foundation  
844 for Statistical Computing.
- 845 **Rath M, Grolig F, Haueisen J, Imhof S. 2014.** Combining microtomy and confocal laser scanning  
846 microscopy for structural analyses of plant–fungus associations. *Mycorrhiza* **24**: 293–300.
- 847 **Ribeiro VC, Leitão CAE. 2020.** Utilisation of Toluidine blue O pH 4.0 and histochemical inferences in plant  
848 sections obtained by free-hand. *Protoplasma* **257**: 993–1008.
- 849 **Rittinger PA, Biggs AR, Peirson DR. 1987.** Histochemistry of lignin and suberin deposition in boundary  
850 layers formed after wounding in various plant species and organs. *Canadian Journal of Botany* **65**: 1886–  
851 1892.

- 852 **Rizzieri YC, Brandes AFN, Cunha Neto IL, Somner GV, Lima MJN, Pereira A, Tamaio N. 2021.**  
853 Ontogeny of divided vascular cylinders in serjania: The rise of a novel vascular architecture in sapindaceae.  
854 *IAWA Journal* **42**: 121–133.
- 855 **Romanov A, Ly K, Kirchoff B. 2021.** Use of Polyethylene Glycol (Peg, Carbowax) As an Embedding  
856 Medium Produces Results Comparable To Paraffin. *Edinburgh Journal of Botany* **78**: 1–13.
- 857 **Ruzin SE. 1999.** *Plant microtechnique and microscopy*. New York, USA.: Oxford University Press.
- 858 **Schindelin J, Arganda-Carreras I, Frise E, Kaynig V, Longair M, Pietzsch T, Preibisch S, Rueden C,**  
859 **Saalfeld S, Schmid B, et al. 2012.** Fiji: an open-source platform for biological-image analysis. *Nature*  
860 *methods* **9**: 676–82.
- 861 **Schneider HM, Klein SP, Hanlon MT, Kaeppler S, Brown KM, Lynch JP. 2020.** Genetic control of root  
862 anatomical plasticity in maize. *The Plant Genome* **13**.
- 863 **Scholz A, Klepsch M, Karimi Z, Jansen S. 2013.** How to quantify conduits in wood? *Frontiers in Plant*  
864 *Science* **4**.
- 865 **Schweingruber F. 2007.** Modification of the Tree- Ring structure due to destructive agents in wood and  
866 bark. In: Timmel T, Wimmer R, eds. *Wood Structure and Environment*. Berlin, Heidelberg: Springer, 179–  
867 227.
- 868 **Spicer R. 2005.** Senescence in secondary xylem: Heartwood formation as an active developmental  
869 program. In: Holbrook N, Zwieniecki M, eds. *Vascular Transport in Plants*. Amsterdam: Elsevier Academic  
870 Press, 457–475.
- 871 **Strock CF, Schneider HM, Galindo-Castañeda T, Hall BT, Van Gansbeke B, Mather DE, Roth MG,**  
872 **Chilvers MI, Guo X, Brown K, et al. 2019.** Laser ablation tomography for visualization of root colonization  
873 by edaphic organisms. *Journal of Experimental Botany* **70**: 5327–5342.
- 874 **Strock CF, Schneider HM, Lynch JP. 2022.** Anatomics: High-throughput phenotyping of plant anatomy.  
875 *Trends in Plant Science* **27**: 520–523.
- 876 **Teixeira-Costa L, Ceccantini GCT. 2016.** Aligning microtomography analysis with traditional anatomy for a  
877 3D understanding of the host-parasite interface - Phoradendron spp. Case study. *Frontiers in Plant Science*  
878 **7**: 1–12.
- 879 **Von Arx G, Crivellaro A, Prendin AL, Čufar K, Carrer M. 2016.** Quantitative wood anatomy—practical  
880 guidelines. *Frontiers in Plant Science* **7**.
- 881 **Yang JT, Schneider HM, Brown KM, Lynch JP. 2019.** Genotypic variation and nitrogen stress effects on  
882 root anatomy in maize are node specific (M Gifford, Ed.). *Journal of Experimental Botany* **70**: 5311–5325.
- 883 **Ziemińska K, Westoby M, Wright IJ. 2015.** Broad Anatomical Variation within a Narrow Wood Density  
884 Range—A Study of Twig Wood across 69 Australian Angiosperms (S Delzon, Ed.). *PLOS ONE* **10**:  
885 e0124892.
- 886
- 887 **Supporting Information**
- 888
- 889 **Table S1** Summary of traditional and modern techniques to study plant anatomy and cell biology.
- 890
- 891 **Table S2** Results of mean fluorescence ANOVA with post-hoc tests between all cell types.
- 892

893 **Fig. S1** Confocal laser scanning microscopy of samples of *Wisteria sinensis* to test infiltration time for  
894 safranin (a-c) and Calcofluor White (d-f). Emission wavelength and time of infiltration are given in each  
895 image.

896

897 **Fig. S2** LATscan of *Wisteria sinensis* stems compared by distinct staining methods. (A) Stained with  
898 Safrablau. (B) Stained with Calcofluor White. Stem diameter: 35 mm.

899

900 **Fig. S3.** Macroscopic image of *Wisteria sinensis* with heartwood. (A) Stem recently collected. (B) Fixed stem  
901 imaged with stereomicroscopy coupled with digital camera. (C) Detail of previous image. Stem diameter: 35  
902 mm.

903

904 **Movie S1** Movie illustrating anastomoses and splitting between vascular cylinders in the compound stem of  
905 *Paullinia pinnata*.

906

907 **Movie S2** Movie illustrating the stem of woody vines in cross section and longitudinal radial section. The  
908 movie starts off in transverse view then reorients to a tangential view. Species name (from left to right):  
909 *Wisteria floribunda*, *Gnetum urens*, *Cocculus orbiculatus* and *Menispermum canadense*.

910

911 **Dataset S1** Results of particle analyzer for quantitative analysis of wood of *Urvillea chacoensis*  
912 (Sapindaceae). Counts are sorted from smaller to largest.

913

914 **Dataset S2** Measurements of emission wavelength of cell walls for different cell types from the stems of four  
915 different species of woody vines.

916

917
